# Supplementary material for: Preparation of PVA hydrogel with high-transparence and investigations of its transparent mechanism
Source: Royal Society of Chemistry journal article supplement (doi:10.1039/c5ra01280e), 2015-01-01
Supplement: c5ra01280e1.pdf [file c5ra01280e1.pdf]

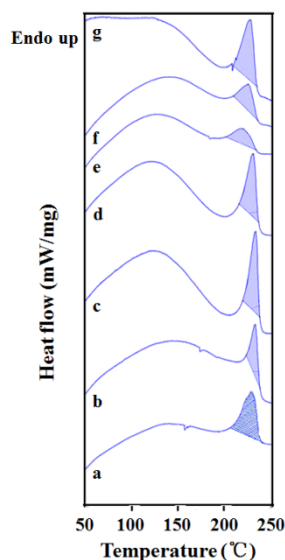

**Fig. S1** DSC curves for pure PVA powder (a) and PVA hydrogels prepared with (b) 0wt%, (c) 40wt%, (d) 68.5wt%, (e) 80wt% and (f) 100wt% DMSO aqueous solution.

**Table S1** The relative degree of crystallinity of PVA hydrogels prepared with different DMSO aqueous solutions.

| DMSO content (wt%) | $\Delta H$ (J/g) | $X_c = \Delta H / \Delta H^* (\%)$ |
|--------------------|------------------|------------------------------------|
| 0                  | 24.13            | 43.72                              |
| 20                 | 39.97            | 72.42                              |
| 40                 | 39.87            | 72.24                              |
| 68.5               | 26.49            | 48.00                              |
| 80                 | 29.83            | 54.05                              |
| 100                | 42.84            | 77.62                              |

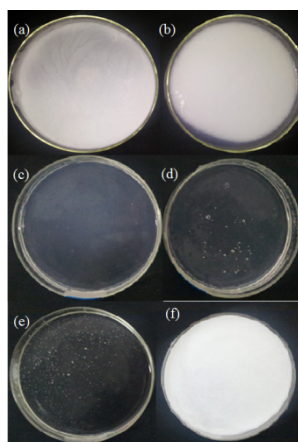

**Fig. S2** PVA hydrogels prepared with different concentration of DMSO aqueous solutions

after being frozen: (a) 0wt%, (b) 20wt%, (c) 40wt%, (d) 68.5wt%, (e) 80wt% and (f) 100wt%  
DMSO aqueous solution.
